# Supplementary material for: Palladium particle-catalyzed selective butadiene hydrogenation: effect of covalent organic framework modification
Source: Royal Society of Chemistry journal article supplement (doi:10.1039/d3re00606a), 2023-12-27
Supplement: d3re00606a1.pdf [file d3re00606a1.pdf]

## Electronic Supplementary Information

### **Palladium particles catalyzed selective butadiene hydrogenation: Effect of covalent organic framework modification**

Xianming Li,<sup>†a</sup> Yi Wang,<sup>†b</sup> Qiao Yuan,<sup>†c,d</sup> Xintai Chen,<sup>b</sup> Xiaoling Mou,<sup>\*b,e</sup> Xiangen Song,<sup>c</sup> Li Yan,<sup>c</sup> Ronghe Lin<sup>\*b,e</sup> and Yunjie Ding<sup>\*b,c,f</sup>

<sup>a</sup>Hangzhou Qingfan Advanced Material Co., Ltd. D118, Science and Technology Park of Hangzhou Normal University, 1378 Wenyi West Road, Hangzhou 311121, China.

<sup>b</sup>Hangzhou Institute of Advanced Studies, Zhejiang Normal University, 1108 Gengwen Road, Hangzhou 116023, China. xiaoling.mou@zjnu.edu.cn, catalysis.lin@zjnu.edu.cn.

<sup>c</sup>Dalian National Laboratory for Clean Energy, Dalian Institute of Chemical Physics, Chinese Academy of Sciences, 457 Zhongshan Road, Dalian 116023, China. dyj@dicp.ac.cn.

<sup>d</sup>University of Chinese Academy of Sciences, Beijing, 100049, China.

<sup>e</sup>Key Laboratory of the Ministry of Education for Advanced Catalysis Materials, Zhejiang Normal University, 688 Yingbin Road, Jinhua 321004, China.

<sup>f</sup>The State Key Laboratory of Catalysis, Dalian Institute of Chemical Physics, Chinese Academy of Sciences, 457 Zhongshan Road, Dalian 116023, China.

<sup>†</sup> Equal contribution.



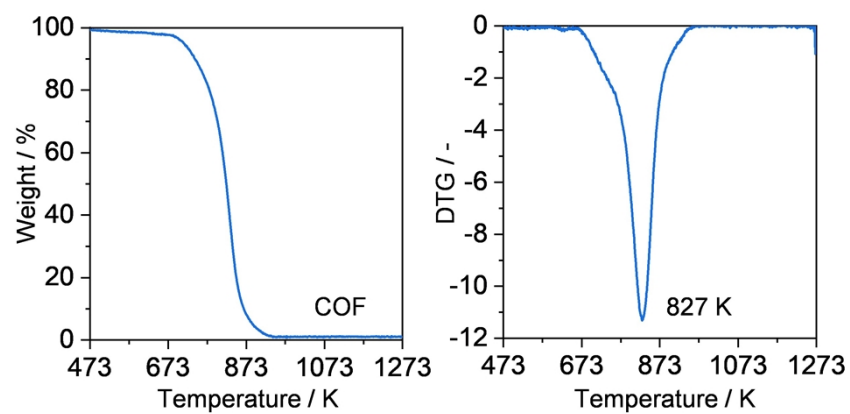

**Fig. S1. a,** The TG, and **b,** DTG weight loss profiles of the COF.

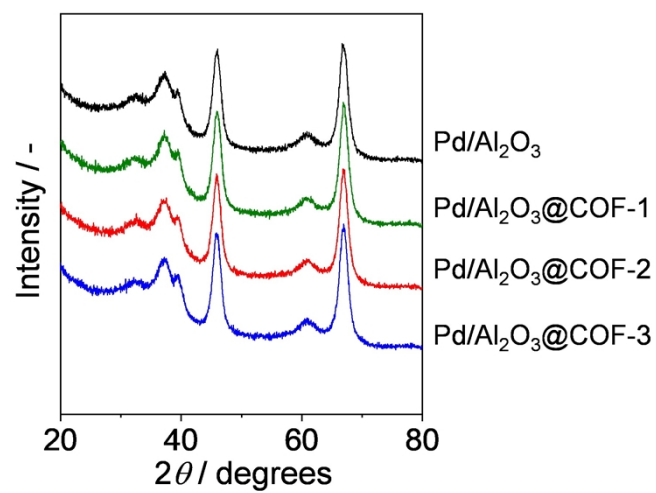

**Fig. S2.** The PXRD patterns of Pd/Al<sub>2</sub>O<sub>3</sub> with and without the modification of COF. Only the diffractions of the carrier can be detected, highlighting the high dispersion of the Pd species.

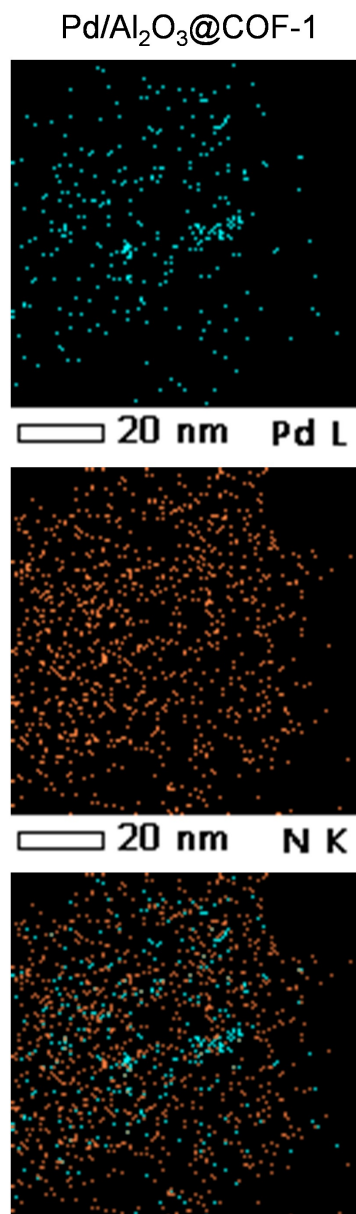

**Fig. S3.** The STEM images with elemental color mapping for Pd/Al<sub>2</sub>O<sub>3</sub>@COF-1.
